1 Physicians' Attitudes towards Secondary Use of Clinical Data for  
2 Biomedical Research Purposes in Germany. Results of a  
3 Quantitative Survey.

4 Anja Köngeter<sup>1</sup>, Christoph Schickhardt<sup>2</sup>, Martin Jungkunz<sup>2</sup>, Katja Mehlis<sup>¶1</sup>/ Eva C.  
5 Winkler\*<sup>¶1</sup>

6  
7 <sup>1</sup>Section for Translational Medical Ethics, Department of Medical Oncology, National  
8 Center for Tumor Diseases, Heidelberg University Hospital, Heidelberg, Germany

9 <sup>2</sup>Section for Translational Medical Ethics, Department of Medical Oncology, National  
10 Center for Tumor Diseases, German Cancer Research Center, Heidelberg, Germany

11

12 <sup>¶</sup> These authors contributed equally to this work.

13 \* Corresponding Author:

14 Prof. Dr. med. Dr. phil. Eva C. Winkler

15 National Center for Tumor Diseases (NCT)

16 Department of Medical Oncology, Section for Translational Medical Ethics,

17 Heidelberg University Hospital

18 Im Neuenheimer Feld 460

19 69120 Heidelberg, Germany

20 Phone: 0049 6221/56-36049

21 E-Mail: [eva.winkler@nct-heidelberg.de](mailto:eva.winkler@nct-heidelberg.de)

22

## 23 **Abstract**

24 **Background:** For biomedical data-driven research purposes, secondary use of clinical  
25 data carries great but largely untapped potential. Physicians' attitudes and their needs  
26 towards secondary data use are essential to inform its practical and ethically sound  
27 implementation but are currently understudied.

28 **Objective:** Therefore, the objectives of the study are to assess physicians' (i) general  
29 attitudes and concerns, (ii) willingness to adapt workflows and to make data available for  
30 secondary use, (iii) group-specific conditions and concerns of physician-scientists and  
31 purely clinical physicians.

32 **Methods:** We developed an online survey based on a literature review and an expert  
33 interview study. Physicians in private practice and at two large German university  
34 hospitals were surveyed from May 2021 until January 2022.

35 **Results:** In total, 446 physicians participated in the survey. 96% [380/397] of all  
36 physicians reported a positive attitude towards secondary use; 87% [31/397] are in-  
37 principle willing to support secondary use of clinical data along with a small proportion  
38 of physicians with fundamental reservations 8%. Secondly, the most important conditions  
39 for adapting workflows was funding of additional time and effort for research-adequate  
40 documentation (71% [286/390]) and the most important condition for providing  
41 patients' clinical data was reliable protection of patients' privacy (67% [254/382]).  
42 Thirdly, physician-scientists were more likely to request additional funding for research-  
43 adequate documentation as a precondition for support (83% vs 69%,  $P=.002$ ) and the  
44 privilege to conduct research with patient data prior to other researchers (43% vs 11%,  
45  $P<.001$ ); while purely clinical physicians more frequently require reliable protection of  
46 patient privacy (76% vs 62%,  $P=.007$ ) and monetary compensation (45% vs 25%,  
47  $P<.001$ ).

48 **Conclusion:** Since this study presents high in-principle willingness of physicians to  
49 support secondary use along with little general concerns, it seems essential to address  
50 physicians' group-specific conditions toward secondary use in order to gain their support.

51

52 **Keywords:** secondary use; data sharing; data access; physician attitudes; physician-  
53 scientists; health data; clinical data;

## 54 **Introduction**

55 Secondary use of clinical data for biomedical research purposes holds promising potential  
56 for various types of non-interventional, data-driven research. We define secondary use as  
57 the collection and reuse of clinical data in data-gathering, non-interventional biomedical  
58 research and quality improvement activities (1). Research with clinical data collected in  
59 routine care bears the advantage of not involving additional physical interventions or the  
60 collection of additional data. In Germany, the medical informatics initiative, funded by the  
61 German Federal Ministry of Education and Research, aims at fostering secondary use of  
62 clinical data from health care facilities (2). Although secondary use aims to improve  
63 biomedical knowledge and thus medical care, it is highly unlikely to directly benefit the  
64 patients who released their data.

65 Physicians' attitudes towards secondary use have hardly been investigated. Some studies  
66 have focused on related topics. For example, a systematic literature review about  
67 researchers' and health care professionals' perspectives on data sharing of clinical trial  
68 data and health administrative data pinpoints major concerns related to privacy, access  
69 to data, and potential for misinterpretation of data (3); data to be shared are defined  
70 differently in these studies, and sometimes are not clearly characterized. Several  
71 *qualitative* studies highlight concerns related to secondary use of different kinds of health  
72 data in general practitioners (GPs) (4-7) and oncologists (8). So far, it is unclear how  
73 pronounced and widespread these concerns are.

74 The scarce socio-empirical evidence is unsatisfying given the relevance of physicians'  
75 support for the implementation of new workflows as suggested by an exploratory  
76 interview study we conducted in preparation for the present survey: experts considered  
77 willingness of physicians to provide support for the implementation of secondary use in  
78 German hospitals and private practices both critical and possibly insufficient (9); one GP

79 stated that peers would be reluctant to change their work routine. Regarding monetary  
80 incentives to change work routine, two qualitative studies of Australian GPs come to  
81 contradictory conclusions (4, 5). To our knowledge, there are no quantitative studies that  
82 examine whether and under what conditions physicians are willing to adjust their work  
83 routine for secondary use.

84 So far, group distinctions between physician-scientists and purely clinical physicians have  
85 not been examined. However, two studies indicate disparities between these groups:  
86 While Canadian health researchers widely accepted secondary use for research (10)  
87 whereas Canadian GPs showed a far lower approval rate (11).

88 The aim of this study is therefore to assess physicians' attitudes and group-specific needs  
89 regarding secondary use which can inform its practical implementation. To address the  
90 delineated research gap, the objectives of the present study are to assess physicians' (i)  
91 general attitudes and concerns, (ii) in-principle willingness to adapt workflows to share  
92 data for secondary use, (iii) group-specific conditions to support secondary use in  
93 physician-scientists and purely clinical physicians. To our knowledge, we present the first  
94 quantitative analysis of physicians' conditions to support secondary use of clinical data  
95 for research purposes and the first study differentiating between physician-scientists' and  
96 purely clinical physicians' needs.

97

## 98 **Methods**

### 99 **Survey Development**

100 The questionnaire is based on a literature review and the results of an expert interview  
101 study (9). The expert interviews indicated distinct perceptions and expectations of  
102 physician-scientists and purely clinical physicians. Therefore, we derived group-specific  
103 hypotheses that we operationalized in the form of questionnaire items. The questionnaire

104 was developed and discussed with members of an interdisciplinary research team  
105 consisting of social scientists, ethicists, legal scholars, and physicians. To ensure  
106 comprehensibility and technical function of the 22 item questionnaire, we pretested the  
107 survey by cognitive interviews (n=6) with physicians with and without experience in  
108 generating and using clinical data for research purposes. Based on the results, we adjusted  
109 the wording of the specific conditions for physicians' support to improve  
110 comprehensibility.

111 The survey included information about risks and benefits to patients associated with  
112 secondary use as well as the potential increase in documentary workload for clinicians to  
113 allow participants to develop an informed opinion. The self-administered, anonymous,  
114 online survey covered attitudinal questions designed as 5-point Likert scale.  
115 Measurement of pronounced research interest was operationalized by asking  
116 participants define themselves as physician-scientists; participants who do not define  
117 themselves as physician-scientist were referred to as purely clinical physicians. The study  
118 obtained ethics approval from the University of Heidelberg's research ethics committee  
119 (reference number S-361/2018). This survey was approved by the data protection officer  
120 of Heidelberg University Hospital. These approvals were valid for all data collections.

## 121 **Sampling and recruitment**

122 The survey was administered via three data collections: For the first data collection the  
123 Cancer Registry of the German federal state of Baden Wuerttemberg sent e-mail  
124 invitations to physicians in Baden Wuerttemberg who had reported more than two  
125 patients in the registry until April 2021 (census, N=3.313). The 2<sup>nd</sup> and the 3<sup>rd</sup> data  
126 collections complemented the first and was targeted to physicians at university hospitals  
127 and thereby a research-oriented environment. For the 2<sup>nd</sup> data collection at the Heidelberg  
128 University Hospital (census, N=1,686) an e-mail distribution list of all physicians with

129 patient contact was created and was authorized by the university hospital board and the  
130 employee council. And for the *3rd data collection* all physicians of the Charité - University  
131 Hospital Berlin were invited via email by the Charité-BIH Clinical Study Center (census,  
132 N=3,870). All e-mail invitations contained a weblink to the anonymous survey.  
133 Individuals who completed the survey were not compensated. Data collections occurred  
134 from May 2021 until January 2022 with a duration of 3-4 weeks each. For the 2<sup>nd</sup> and 3<sup>rd</sup>  
135 data collection, an e-mail reminder was sent out 8 days after the first invitation.

## 136 **Analysis**

137 Descriptive statistics were used to express categorical variables as counts and  
138 percentages. Differences in proportions were assessed for statistical significance ( $P <$   
139 0.05) by way of  $\chi^2$  tests. Significances of group differences in mean values were calculated  
140 using the Mann-Whitney U test (two-tailed). All analyses were performed using SPSS IBM  
141 version 28.

142

## 143 **Results**

### 144 **Participant characteristics**

145 Of the 8,615 physicians contacted, 446 responded to the survey (response rate: 5%); after  
146 excluding participants who answered less than 50% of the items or dropped out before  
147 item no. 11, the dataset used for analysis encompassed 397 cases. Of these included  
148 physicians, 79% [313/397] worked at a university hospital and 15% [60/397] in a private  
149 practice (Table 1). Gender distribution was balanced. 62% [245/397] reported more than  
150 10 years of work experience'.

151 Overall, 63% [251/397] indicated perceiving themselves as physician-scientist; at  
152 university hospitals 84% [243/294] of all physicians considered themselves physician-

153 scientists. 31% [125/397] were defined as purely clinical physicians by indicating that  
 154 they do not perceive themselves as physician-scientists; 98% [57/58] of all physicians  
 155 working in private practice were purely clinical physicians. Of all participants, 81%  
 156 [321/397] reported having contributed to studies using clinical data in the last 5 years.

157 **Table 1. Demographics of participants (n=397)**  
 158

| Characteristics                                                                                     | Values, n (%) |
|-----------------------------------------------------------------------------------------------------|---------------|
| <b>Affiliation</b>                                                                                  |               |
| University Hospital / Academic Teaching Hospital                                                    | 313 (78.64)   |
| Private practice                                                                                    | 60 (15.08)    |
| Public community hospitals and for-profit hospitals                                                 | 20 (5.03)     |
| n/a                                                                                                 | 4 (1.26)      |
| <b>Years of Service</b>                                                                             |               |
| ≤ 10                                                                                                | 150 (37.69)   |
| > 10                                                                                                | 245 (61.56)   |
| n/a                                                                                                 | 2 (0.50)      |
| <b>Medical Speciality (top five)</b>                                                                |               |
| Internal Medicine                                                                                   | 88 (22.11)    |
| Surgery                                                                                             | 39 (9.80)     |
| Gynecology                                                                                          | 39 (9.80)     |
| Anesthesiology                                                                                      | 29 (7.29)     |
| Pediatrics and Youth Medicine.                                                                      | 25 (5.53)     |
| <b>Sex</b>                                                                                          |               |
| Female                                                                                              | 180 (45.23)   |
| Male                                                                                                | 207 (52.01)   |
| n/a                                                                                                 | 10 (2.52)     |
| <b>Identifies as physician-scientist</b>                                                            |               |
| Yes                                                                                                 | 251 (63.07)   |
| No                                                                                                  | 125 (31.41)   |
| n/a                                                                                                 | 21 (5.29)     |
| <b>Involved in conducting studies using clinical data from patient care within the last 5 years</b> |               |
| Yes                                                                                                 | 321 (80.65)   |
| No                                                                                                  | 72 (18.09)    |
| n/a                                                                                                 | 4 (1.01)      |

159



## 160 **General attitudes towards supporting secondary use**

161 With 96% [380/397] almost all respondents deemed secondary data use for research  
162 purposes important and 68% [269/397] hold the view that, as a physician, they have a  
163 moral obligation to provide clinical data from patient care for research purposes (Fig 1).  
164 Only 8% [31/397] of the participants had fundamental reservations. Yet, 13% [50/397]  
165 of respondents were concerned that patients would report fewer details about their  
166 illness and 11% [41/397] of physicians would document differently to protect their  
167 patients' sensitive information (e.g. stigmatizing data) against misuse; purely clinical  
168 physicians expressed significantly stronger fundamental reservation ( $\bar{x}$ =2.04 vs  $\bar{x}$ =1.50,  
169  $P<.001$ ), were more concerned that their patients will report fewer details ( $\bar{x}$ =2.32 vs  
170  $\bar{x}$ =1.93,  $P=.001$ ), and were more inclined to change their way of documentation ( $\bar{x}$ =2.12  
171 vs  $\bar{x}$ =1.73,  $P=.001$ ) compared to physician-scientists (*Table 2*).

172 87% [348/390] of all surveyed physicians were willing to support secondary research use  
173 in principle. When being asked about potentially necessary adjustments of the workflow,  
174 71% [286/390] were willing to implement changes for documentation, and 67%  
175 [269/390] were willing to inform and consent patients for secondary use. In contrast to  
176 purely clinical physicians, physician-scientists were more convinced about the  
177 importance of secondary use ( $\bar{x}$ =4.90 vs  $\bar{x}$ =4.53,  $P<.001$ ), more willing to adjust  
178 documentation ( $\bar{x}$ = 4.14 vs  $\bar{x}$ =3.56,  $P<.001$ ), and more willing to obtain informed consent  
179 ( $\bar{x}$ =4.09 vs  $\bar{x}$ =3.48,  $P<.001$ ).

180

181 **Figure 1: General attitudes and concerns of physicians towards secondary use of clinical data for research purposes and**  
 182 **their willingness to support secondary use**

183

184 **Table 2: Significance of differences in general attitudes toward secondary use and willingness to support secondary use by**  
 185 **self-perception as physician-scientist and purely clinical physician**

| <b>Agreement to Statement</b>                                                                                                                                                                  | <b>Physician scientist, mean (SD)</b> | <b>Purely clinical physician, mean (SD)</b> | <b>P value<sup>a</sup></b> |
|------------------------------------------------------------------------------------------------------------------------------------------------------------------------------------------------|---------------------------------------|---------------------------------------------|----------------------------|
| I think it is fundamentally important that patients' clinical data be used for research purposes. (n = 397)                                                                                    | 4.90 (0.41)                           | 4.53 (0.85)                                 | <.001                      |
| I am generally willing to support research using my own patients' clinical data. (n = 397)                                                                                                     | 4.66 (0.81)                           | 4.12 (1.14)                                 | <.001                      |
| As a physician, I have a moral obligation to provide clinical data from patient care for research purposes (if patients consent to this use). (n = 397)                                        | 4.12 (1.12)                           | 3.56 (1.27)                                 | <.001                      |
| In principle, I am prepared to implement any necessary adjustments to workflows in documentation for research purposes as part of my job. (n = 390)                                            | 4.14 (1.00)                           | 3.56 (1.16)                                 | <.001                      |
| In principle, I am prepared to implement any necessary adjustments to workflows with regard to information and consent processes as part of my job. (n = 390)                                  | 4.09 (1.02)                           | 3.48 (1.19)                                 | <.001                      |
| I have fundamental reservations about supporting research with clinical data from my own patients. (n = 397)                                                                                   | 1.50 (0.91)                           | 2.04 (1.22)                                 | <.001                      |
| I am concerned that my patients will report fewer details about their conditions if they know that their clinical data will be used for research purposes. (n = 397)                           | 1.93 (1.05)                           | 2.32 (1.16)                                 | .001                       |
| If my patients' clinical data is collected for research, I will document differently to protect my patients' data against misuse (e.g., I will not document stigmatizing diagnoses). (n = 397) | 1.73 (1.03)                           | 2.12 (1.21)                                 | .001                       |

<sup>a</sup> Significances of group differences in mean values were calculated using the Mann-Whitney U test; Values in italics are significant at .05 level of significance (two-tailed); 5 Point Likert Scale: Disagree 1; Agree 5.

## 186 **Conditions for adapting workflows**

187 Participants were then asked to indicate what seems most important to them for adapting  
 188 their workflows in order to support secondary data use. They did so by selecting the three  
 189 most important conditions out of a list. The most frequently selected conditions were  
 190 funding of additional person-hours for research-appropriate documentation (77%  
 191 [302/390]), funding of newly developed and user-friendly software to support research-  
 192 appropriate documentation (62% [243/390]), and funding of additional person-hours for  
 193 obtaining informed consent (60% [236/390]) (*Table 3*). Physicians-scientists and purely  
 194 clinical physicians differed in only one aspect; funding of additional person-hours for

195 research-adequate documentation was more important to physician-scientists (83% vs  
 196 69%,  $P=.002$ ).

197

198 **Table 3: Conditions for adapting workflows for secondary use (documentation and obtain consent); significance of group**  
 199 **differences (n=390)**

200

|                                                                                                                                                                                                                  | All participants, n (%) | Physician-scientists, n (%) <sup>b</sup> | Purely clinical physicians, n (%) <sup>b</sup> | <i>P value</i> <sup>c</sup> |
|------------------------------------------------------------------------------------------------------------------------------------------------------------------------------------------------------------------|-------------------------|------------------------------------------|------------------------------------------------|-----------------------------|
| <b>Conditions to implement adaptations of the workflows<sup>a</sup></b>                                                                                                                                          |                         |                                          |                                                |                             |
| Funding for additional person-hours for research-appropriate documentation                                                                                                                                       | 302 (77.44)             | 205 (82.66)                              | 83 (68.60)                                     | <i>.002</i>                 |
| Funding of newly developed, user-friendly software to support research-appropriate documentation                                                                                                                 | 243 (62.31)             | 162 (65.32)                              | 67 (55.37)                                     | .064                        |
| Funding for additional person-hours for patient information related to consent                                                                                                                                   | 236 (60.51)             | 153 (61.69)                              | 71 (58.67)                                     | .578                        |
| Improving the quality of care across the healthcare system                                                                                                                                                       | 123 (31.54)             | 77 (31.04)                               | 38 (31.40)                                     | .945                        |
| Improving the quality of care in one's own practice/department through feedback systems fed by the analysis of clinical data from all integrated practices/departments - including one's own practice/department | 89 (22.82)              | 50 (20.16)                               | 35 (28.92)                                     | .061                        |
| Free access to publications based on routine care clinical data                                                                                                                                                  | 69 (17.69)              | 40 (16.12)                               | 26 (21.48)                                     | .207                        |
| Certificate in recognition of generating high-quality clinical data for research purposes                                                                                                                        | 23 (5.90)               | 17 (6.85)                                | 6 (4.95)                                       | .479                        |

<sup>a</sup> Multiple Answer item; maximum 3 answers.

<sup>b</sup> Of all participants who answered this item (n=390), n= 369 indicated whether or not they consider themselves physician-scientists (n=248) or physicians (n=121).

<sup>c</sup> Chi-Squared Test (Pearson); values in italics are significant at .05 level of significance.

201

202 When asked about participants' willingness to spend additional time for research-  
 203 adequate documentation per patient visit, 53% [165/314] of the participants was willing  
 204 to document up to additional 2-6 minutes, 25% [79/314] of the participants to document  
 205 up to 2 minutes, and 22% [70/314] was willing to document  $\geq 6$  minutes. A significantly  
 206 larger proportion of physician-scientists were willing to document  $\geq 6$  minutes  
 207 compared to purely clinical physicians (28% vs 11%,  $P=.005$ ).

208 63% [249/386] of respondents favoured trained, non-medical staff to inform and consent  
 209 patients about secondary use; 31% [123/386] felt themselves, as physicians, responsible  
 210 for this task.

211

## 212 **Conditions for providing patients' clinical data**

213 All participants were asked about conditions they deem most important in order to make  
214 their patients' clinical data available for secondary use. The most frequently reported  
215 conditions were: reliable protection of patients' privacy (66% [254/382]), extra  
216 protection for sensitive data (e.g., genetic data, psychiatric data) (47% [179/382]), and  
217 notification about additional/incidental findings relevant to their patients' health (37%  
218 [140/382]) (Table 3).

219 Patient privacy was significantly more often important to purely clinical physicians than  
220 to physician-scientists (76% vs 62%,  $P=.007$ ) as was the monetary compensation for  
221 making research-adequate clinical data available (45% vs 25%,  $P<.001$ ). For Physician-  
222 scientists the right to first conduct their own research with their patients' clinical data  
223 was more relevant (43% vs 11%,  $P<.001$ ) as was co-authorship in scientific articles based  
224 on clinical data of their patients (31% vs 8%,  $P<.001$ ).

225

226

227 **Table 4: Conditions for providing patients' clinical data available for medical studies and significance of differences in**  
 228 **proportions by self-perception as physician-scientist or physician (n=382)**  
 229

|                                                                                                                                                                                                                         | All participants, n (%) | Physician-scientists, n (%) <sup>b</sup> | Purely clinical physicians, n (%) <sup>b</sup> | P value <sup>c</sup> |
|-------------------------------------------------------------------------------------------------------------------------------------------------------------------------------------------------------------------------|-------------------------|------------------------------------------|------------------------------------------------|----------------------|
| <b>Conditions to make your patients' clinical data available<sup>a</sup></b>                                                                                                                                            |                         |                                          |                                                |                      |
| Reliable protection of the privacy of my patients                                                                                                                                                                       | 254 (66.49)             | 149 (61.57)                              | 91 (75.83)                                     | .007                 |
| Special protection measures for sensitive data (e.g. genetic data, psychiatric data)                                                                                                                                    | 179 (46.85)             | 108 (44.62)                              | 61 (50.83)                                     | .265                 |
| Notification of additional diagnostic findings in my patients that will be identified in the future as a result of planned research use of clinical data (for example, through novel methods of analysis of image data) | 140 (36.64)             | 82 (33.88)                               | 50 (41.66)                                     | .148                 |
| Right to initially conduct my own research with my patients' clinical data                                                                                                                                              | 125 (32.72)             | 104 (42.97)                              | 13 (10.83)                                     | <.001                |
| Monetary compensation for providing appropriately generated datasets suitable for research purposes                                                                                                                     | 122 (31.93)             | 60 (24.79)                               | 54 (45.00)                                     | <.001                |
| Co-authorship of scientific journal articles that use my patients' data                                                                                                                                                 | 91 (23.82)              | 75 (30.99)                               | 10 (8.33)                                      | <.001                |
| Only with my permission or the permission of my supervisor will researchers receive the clinical data of my patients (without identifying information)                                                                  | 60 (15.70)              | 45 (18.59)                               | 15 (12.50)                                     | .142                 |
| Mention my department/practice in scientific journal articles that use my patients' data                                                                                                                                | 37 (9.69)               | 24 (9.92)                                | 13 (10.83)                                     | .787                 |
| Mention my name in the acknowledgements of scientific journal articles that use my patients' data                                                                                                                       | 13 (3.40)               | 9 (3.80)                                 | 3 (2.50)                                       | .542                 |

<sup>a</sup> Multiple Answer item; maximum 3 answers.

<sup>b</sup> Of all participants who answered this item (n=382), n= 369 indicated whether or not they consider themselves physician-scientists (n=242) or physicians (n=120).

<sup>c</sup> Chi-Squared Test (Pearson); values in italics are significant at .05 level of significance.

230  
 231 Being asked about the acceptance of potential data-users, 40% [159/381] of respondents  
 232 agreed that all researchers, regardless of their affiliation, should be allowed to use their  
 233 patients' clinical data. 46% [174/381] were opposed to making clinical data available for  
 234 researchers working for companies conducting medical research. 18% [67/381] did not  
 235 want to provide data for collaborative projects between public research institutions and  
 236 private companies.  
 237 Participants were asked about data ownership. They were divided on whether data can  
 238 be owned (51%) or not (49%). Among those who held that data can be owned, 54%

239 considered patients as data owners, and 40% believed that the practices and hospitals  
240 where data are collected or the physicians own the data, and only 6% thought the data  
241 belong to everyone who can use the data to add value to medical care. Purely clinical  
242 physicians were significantly more likely to think that data belong to patients (66% vs  
243 48%,  $P=.024$ ). Interestingly, the view that data can be owned was positively associated  
244 ( $\eta^2=.191$   $P<.001$ ) with the willingness to provide patients' clinical data.

245

#### 246 *Concerns about provision of patient data*

247 Participants were asked about their specific concerns with respect to the provision of  
248 their patients' clinical data for secondary use. These concerns differed significantly  
249 between the two groups (*Table 4*). Compared to physician-scientists, purely clinical  
250 physicians were significantly more likely to have concerns about misuse of their patients'  
251 clinical data through unauthorized access to datasets by third parties (75% vs 53%,  
252  $P<.001$ ), failure to protect their patients' privacy (62% vs 36%,  $P<.001$ ), and  
253 discrimination based on clinical data against their patients (27% vs 15%,  $P=.009$ ). Purely  
254 clinical physicians were also more likely to have concerns about increased liability risk  
255 (e.g., research uncovers a misdiagnosis in their own practice/department) (36% vs 26%,  
256  $P=.044$ ), and a loss of patients' trust in the physician-patient relationship (21% vs 12%,  
257  $P=.019$ ). The second most common concern of physician-scientists (after concerns about  
258 privacy of their patients) was insufficient data quality that can result in inaccurate  
259 findings (62% vs 42%,  $P<.001$ ), and that other researchers conduct research using their  
260 patients' clinical data before they do (43% vs 13%,  $P<.001$ ).

261

262

263 **Table 5: Concerns about providing patients' clinical data for secondary use and significance of group differences (n=382)**

264

|                                                                                                                                                                                                                    | all participants, n (%) | physician-scientists, n (%) <sup>b</sup> | Purely clinical physicians, n (%) <sup>b</sup> | <i>P</i> value <sup>c</sup> |
|--------------------------------------------------------------------------------------------------------------------------------------------------------------------------------------------------------------------|-------------------------|------------------------------------------|------------------------------------------------|-----------------------------|
| <b>Concerns about making patients' clinical data available<sup>a</sup></b>                                                                                                                                         |                         |                                          |                                                |                             |
| Misuse of data through unauthorized access to data records                                                                                                                                                         | 229 (59.94)             | 127 (52.47)                              | 90 (75.00)                                     | <i>&lt;.001</i>             |
| Insufficient data quality, which can cause studies to produce erroneous results                                                                                                                                    | 215 (56.28)             | 151 (62.39)                              | 50 (41.66)                                     | <i>&lt;.001</i>             |
| Failure to adequately protect the privacy of my patients                                                                                                                                                           | 174 (45.54)             | 87 (35.95)                               | 74 (61.66)                                     | <i>&lt;.001</i>             |
| Other researchers conduct research using the clinical data from my practice/department before I do                                                                                                                 | 124 (32.46)             | 104 (42.97)                              | 15 (12.50)                                     | <i>&lt;.001</i>             |
| Novel liability issues/increased liability risk (e.g., research uncovers misdiagnosis in own practice/department)                                                                                                  | 115 (30.10)             | 62 (25.61)                               | 43 (35.83)                                     | <i>.044</i>                 |
| New technological developments with new possibilities for re-identification carry the potential for harm to my patients                                                                                            | 89 (23.29)              | 51 (21.07)                               | 32 (26.66)                                     | <i>.233</i>                 |
| Discrimination against my patients on the basis of their clinical data, e.g. in the case of re-identification of individual patients or on the basis of belonging to a group with a certain disease or disposition | 74 (19.37)              | 37 (15.28)                               | 32 (26.66)                                     | <i>.009</i>                 |
| Performance comparisons with other practices/departments at hospitals conducted using clinical data from external agencies                                                                                         | 71 (18.58)              | 47 (19.42)                               | 21 (17.50)                                     | <i>.659</i>                 |
| Loss of trust in the doctor-patient relationship on the part of the patients                                                                                                                                       | 61 (15.96)              | 28 (11.57)                               | 25 (20.83)                                     | <i>.019</i>                 |
| Future studies pursue research purposes that harm my patients                                                                                                                                                      | 31 (8.11)               | 16 (6.61)                                | 11 (9.16)                                      | <i>.384</i>                 |

<sup>a</sup> Multiple Answer item.

<sup>b</sup> Of all participants who answered this item (n=382), n= 369 indicated whether or not they consider themselves physician-scientists (n=242) or physicians (n=120).

<sup>c</sup> Chi-Squared Test (Pearson); values in italics are significant at .05 level of significance.

265

## 266 **Discussion**

### 267 **Main Findings**

268 Information on whether and under what preconditions physicians are willing to make  
 269 their patients' clinical data available for research is vital for practical and ethically sound  
 270 implementation of secondary use. Here we report results of a survey among 397  
 271 physicians working in two university medical centres and in private practice on their  
 272 general attitudes, concerns, in-principle willingness and conditions for enabling support

273 of secondary use of clinical data for research purposes. To our knowledge, we present the  
274 first quantitative analysis of physicians' conditions to support secondary use of clinical  
275 data for research purposes.

276 Firstly, we found a highly positive general attitude of physicians towards secondary use  
277 along with little fundamental reservations. Secondly, physicians showed widespread in-  
278 principle willingness to support secondary use; most important conditions for practical  
279 implementation were reliable protection of patients' privacy as well as funding of  
280 additional person-hours for documentation and consenting patients. Third, group specific  
281 differences were prevalent: Physician-scientists were more likely to be concerned about  
282 data quality, required additional funding for research-adequate documentation and the  
283 right to first conduct research with their patients' clinical data; in contrast, purely clinical  
284 physicians were more prone to be concerned about patient privacy and the physician-  
285 patient relationships, and to require, hence, reliable patient privacy as well as monetary  
286 compensation.

287

### 288 **High in-principle willingness for supporting secondary use**

289 Despite methodological and thematic differences that limit comparability, we aim to  
290 embed our findings carefully within related studies. Among all 397 surveyed physicians,  
291 a very high proportion of physicians were of the view that secondary use is important  
292 (96%) and were in-principle willing to support secondary use (87%). This corresponds  
293 with a previous survey in a small sample in Canadian health researchers presenting the  
294 very strong general acceptance (96%) of using "citizens' health data for research" (10).  
295 Our study further found a majority of physicians viewing the support of secondary use as  
296 a moral duty of peer physicians (68%). This view resonates with the results of a study we  
297 have previously conducted in which cancer patients attributed an obligation to their



298 physicians to support secondary use (91%) (12). An ethical discussion of such a duty to  
299 support secondary use seems essential in order to resolve the tension of conflicting duties.  
300 Only few physicians expressed fundamental reservations about secondary use (8%). This  
301 finding helps to classify the importance of qualitative studies that emphasized widespread  
302 and severe concerns to the German context (4, 5, 11).  
303 This study showed that making clinical data available for researchers who work for  
304 companies and conduct medical research was acceptable for the majority of physicians  
305 (40%). This aspect was previously considered problematic in qualitative studies among  
306 physicians (5, 8, 13). Acceptance rate of data use by company researchers in our study  
307 was considerably higher than in a small sample of GPs conducted in Canada being asked  
308 for use of electronic health record data for research by pharmaceutical industry (9%;  
309 n=46) (11). This discrepancy should be examined in a more nuanced way with a focus on  
310 types of data use and consideration of wordings such as 'pharmaceutical industry' which  
311 could carry negative connotations. Physicians were more willing to support secondary  
312 use in case of public-private-partnerships which is consistent with findings of a  
313 qualitative study with GPs conducted in the UK that indicate a higher level of trust in  
314 public-private partnerships than in companies (6).

315

## 316 **Most important conditions for practical implementation**

### 317 *Adjustment of workflows*

318 About three-quarters of physicians were in principle willing to adjust their workflows to  
319 support secondary use (76%). Physicians were most interested in keeping expenditures  
320 in terms of time, personnel and money to a minimum. This is consistent with a Canadian  
321 qualitative study in GPs identifying uncompensated staff time as a major hurdle (5).  
322 Studies report that physicians being already increasingly dissatisfied with more and more

323 time occupied for documenting in electronic health records for medical care – meaning  
324 even without documentation for research purposes - at the expense of time spent in  
325 contact with patients (14, 15). One quantitative study even suggests electronic health  
326 record use being related to burnout (16). Hence, physicians will likely be sensitive  
327 towards additional time and work that could further reduce contact time with their  
328 patients. While physicians in this study indicated that additional documentation time per  
329 patient visit of 5 minutes on average would be acceptable for them, they also specifically  
330 requested extra funding for personnel for research-adequate documentation of data  
331 (77%). Software solutions might be apt to reduce the burden of documentation, if they  
332 decrease time for documentation significantly (17), and cover a range of functional tasks  
333 (18). Healthcare personnel and hospital management should be directly involved in the  
334 development of new workflows and software at an early stage (4) to prevent disruption  
335 of complex workflows.

336 The majority of physicians agreed that non-medical staff should consent patients for  
337 secondary use (62%). We suppose that physicians clearly distinguish consent to  
338 interventional clinical trials from consent to *non-interventional* secondary research use.  
339 Hence, obtaining informed consent for secondary use by trained, non-medical staff by  
340 default is worth considering.

341

#### 342 *Provision of patient data*

343 In contrast to physician-scientists, purely clinical physicians were less inclined to be in  
344 principle willing to make their patients' clinical data available for research purposes  
345 ( $\bar{x}=4,66$  vs  $\bar{x}=4,12$ ,  $P<.001$ ). Although comparability is limited due to differences in the  
346 study population this finding is in line with a survey among GPs from Canada with  
347 moderate acceptance rate of sharing patient data with university researchers (60%) (10).

348 Also, purely clinically oriented physicians were more likely to see patients as the owner  
349 of the data while overall the positions on the question whether data can be owned at all  
350 was quite divided. This reflects the controversial ethical debate about the concept of  
351 ownership with regard to health data where convincing arguments would rather support  
352 ownership in a sense of control and engagement than in the sense of property (19).

353 The most important condition on the part of physicians to make clinical data available for  
354 secondary use was the reliable protection of patient privacy (67%). This finding is  
355 consistent with existing literature indicating that physicians feel responsible for patient  
356 privacy and view themselves as data custodians (5, 20). Therefore, reliable data security  
357 and data protection should be implemented, the question of data ownership should be  
358 clarified, and physicians should be informed transparently about data protection  
359 measures of data initiatives (and also about data leaks if they occurred) so that trust in  
360 secondary use can be built.

361 Feedback systems that help physicians to improve internal quality and recognition of  
362 their efforts to contribute to a learning healthcare system might strengthen the link  
363 between care and research.

364

### 365 **Addressing physician-scientists' research interests**

366 We found that physician-scientists and purely clinical physicians differed systematically  
367 in terms of conditions they place on and concerns they have about secondary use.  
368 Physician-scientists' research experiences and interests might be the reason for their  
369 significantly stronger concerns about insufficient data quality for research purposes. This  
370 finding is in line with a mixed-method study showing concerns about data quality among  
371 health researchers (21). To ensure physician-scientists' trust in research-adequate data  
372 quality, implementing appropriate measures and resources for high quality

373 documentation should receive high priority. Physician-scientists were also more likely  
374 than purely clinical physicians to demand additional funding for research-adequate  
375 documentation. According to literature, support for physician-scientists is needed to  
376 perform research activities alongside patient care (22).

377 Simultaneously, physicians should be made aware that their documentation practices  
378 have direct consequences for the scientific usability of clinical data and for the quality of  
379 research results.

380 Compared to purely clinical physicians, physician-scientists emphasised significantly  
381 more often the privilege to conduct research with patient data prior to other researchers.  
382 A systematic literature review demonstrated that health researchers want to exert some  
383 control over data they had collected (3). Hence, potential rights of – time-limited -  
384 exclusive use might facilitate the implementation of secondary use, but need to be  
385 weighed against the argument of maximizing utility of data generated in a publicly funded  
386 healthcare system. Additional measures might be co-authorship or other ways of  
387 recognition.

388

### 389 **Addressing purely clinical physicians' interests**

390 Purely clinical physicians were significantly more often concerned than physician-  
391 scientists about their patients losing trust in the physician-patient relationship if data  
392 are made available for secondary use. Such concerns have not been reported so far. Purely  
393 clinical physicians were also more likely to be concerned about protection of their  
394 patients' privacy and placed reliable privacy protection as the most important condition  
395 to support secondary use. They even reported to protect their patients' data by  
396 documenting differently. According to the literature, trust in data users seems to be a vital  
397 facilitator for secondary use (5, 21, 23) as well as a trustworthy governance structure and

398 oversight bodies, e.g. use and access committees (24) (13). To build trust in data  
399 infrastructure and governance of secondary use, ensuring and communicating patient  
400 privacy protection is a fundamental prerequisite, particularly for purely clinical  
401 physicians.

402 An important incentive for purely clinical physicians was monetary compensation of  
403 expenses for secondary use. Since almost all purely clinical physicians work in private  
404 practices, this finding might reflect their economic situation as mostly self-employed  
405 entrepreneurs. Since purely clinical physicians typically do not plan to use and directly  
406 benefit from the preparation and provision of data, fair compensation schemes seem  
407 imperative for this group (5).

408

## 409 **Limitations**

410 The low response rate (5%) reflects difficulties to motivate physicians to participate in  
411 studies have been recognized (25) with reasons for non-participation such as survey  
412 fatigue and minimal time resources. Also, the subject of the present study does not  
413 directly address topics relevant to patient care which may have further reduced interest  
414 in participation. Given the low response rate, self-selection bias cannot be ruled out. The  
415 high proportion of physicians working at university hospitals might lead to a study  
416 population with increased thematic (research) interest, possibly overstating positive  
417 attitude towards secondary use. We used a self-developed questionnaire without  
418 validated measurement instruments, yet tested by cognitive interviews. The sample is not  
419 representative of the German medical profession, yet our results may provide indications  
420 of relevant needs and concerns of physicians in Germany.

421 We assumed that organizational background exerts relevant influence on physicians'  
422 attitudes toward secondary use as physicians working in private practice potentially feel

423 more in charge for data protection standards of their practice than physicians working in  
424 a hospital. The distinction between physicians working in hospitals and in private practice  
425 needs further assessment in a larger dataset to inform implementation of secondary use  
426 in different organisational settings.

427

## 428 **Conclusion**

429 This first quantitative study on the perspective on secondary health data use of physicians  
430 in an research prone environment compared to those in private practice should inform  
431 further studies and the setup of infrastructures for secondary use of clinical data in  
432 Germany and possibly beyond. We found high in-principle willingness of physicians to  
433 support secondary use and low general concerns. High in-principle willingness and little  
434 concerns indicate the importance of considering physicians' demands and conditions in  
435 order to foster secondary use: most important conditions were protection of patient  
436 privacy and manageable expenses in terms of time, personnel and money. If extra  
437 expenses occur, the provision of funding to compensate for them is expected such as  
438 medical documentation specialists, non-medical staff obtaining consent, and user-centred  
439 documentation software - in order to not further reduce contact time with patients.  
440 Adaptation of workflows for research-adequate documentation and consenting patients  
441 should be pilot-tested in participatory (research) formats in order to prevent disruption  
442 of complex clinical processes.

443 Our results demonstrated group-specific differences. *Physician-scientists'* answers  
444 mirrored the rationales of the scientific system with concerns about research-adequate  
445 data quality, requesting incentives such as the privilege of first conducting research and  
446 funding for research-adequate documentation. Building trust in data repositories and its  
447 users seems essential for physician-scientists' support and readiness to conduct research

448 with clinical data themselves. *Purely clinical physicians* were concerned about patients'  
449 privacy and about a possibly worsening physician-patient relationship. Their most  
450 important condition for support of secondary use was the protection of patient privacy  
451 but also monetary compensation which can be attributed to the often self-employed work  
452 in private practices performed by this group. Besides establishing monetary  
453 compensation schemes, for purely clinical physicians, relevant conditions to support  
454 secondary use include ensuring and communicating patient privacy protection  
455 accompanied by a trustworthy data governance structure that enables transparent data  
456 use.

457

## 458 **Acknowledgements**

### 459 Ethics approval and consent to participate

460 Informed consent was obtained from individuals who participated in the study pretests  
461 and the written survey. The datasets generated and analyzed in the current study are  
462 available online (<https://doi.org/10.11588/data/5JCEVW>).

463 This manuscript was developed within the framework of the project "Learning from  
464 Clinical Data (LinCDat)" funded by the Deutsche Forschungsgemeinschaft (DFG, German  
465 Research Foundation) – 406103282. The project funding was awarded to ECW. The  
466 funders had neither involvement in study design; in the collection, analysis and  
467 interpretation of data; in the writing of the report, nor in the decision to submit the article  
468 for publication. There was no additional external funding received for this study.

469 All authors contributed to the study conception and design. Material preparation, data  
470 collection and analysis were performed by AK and KM. ECW and KM supervised the work  
471 and supported data interpretation. The first draft of the manuscript was written by AK

472 and iteratively reviewed by ECW. All authors commented on previous versions of the  
473 manuscript. All authors read and approved the final manuscript.  
474 We would like to thank the Cancer Registry of Baden-Württemberg for support of data  
475 collection as well as Sein Schmidt and Verena Benz of the Charité-BIH Clinical Study  
476 Center. We also thank our project partners Kai Cornelius, Markus Spitz (University of  
477 Heidelberg, Germany) and Adrian Thorogood (University of Luxemburg) for conceptual  
478 counselling. We are also thankful to Kai Cornelius for establishing contact with the  
479 Charité-BIH Clinical Study Center We acknowledge Hellen Kachler and Niamh Sulzbach  
480 (both: National Center for Tumor Diseases, Heidelberg University Hospital, Germany) for  
481 their assistance in researching the literature, data entry, and linguistic correction of the  
482 manuscript.

483

## 484 **Conflicts of Interest**

485 The authors declare that the research was conducted in the absence of any commercial or  
486 financial relationships that could be construed as a potential conflict of interest.

487

## 488 **References**

- 489 1. Jungkunz M, Köngeter A, Mehlis K, Winkler EC, Schickhardt C. Secondary Use of Clinical Data  
490 in Data-Gathering, Non-Interventional Research or Learning Activities: Definition, Types, and a  
491 Framework for Risk Assessment. *J Med Internet Res*. 2021;23(6):e26631.
- 492 2. Semler SC, Wissing F, Heyder R. German Medical Informatics Initiative. *Methods Inf Med*.  
493 2018;57(S 01):e50-e6.
- 494 3. Hutchings E, Loomes M, Butow P, Boyle FM. A systematic literature review of researchers' and  
495 healthcare professionals' attitudes towards the secondary use and sharing of health administrative  
496 and clinical trial data. *Systematic Reviews*. 2020;9(1):1-27.



- 497 4. Monaghan T, Manski-Nankervis J-A, Canaway R. Big data or big risk: general practitioner,  
498 practice nurse and practice manager attitudes to providing de-identified patient health data from  
499 electronic medical records to researchers. *Australian Journal of Primary Health*. 2021;26(6):466-71.
- 500 5. Hodgkins AJ, Mullan J, Mayne DJ, Boyages CS, Bonney A. Australian general practitioners'  
501 attitudes to the extraction of research data from electronic health records. *Aust J Gen Pract*.  
502 2020;49(3):145-50.
- 503 6. Ipsos MORI. The One-Way Mirror: Public attitudes to commercial access to health data - Report  
504 prepared for the Wellcome Trust. 2016.
- 505 7. Vezyridis P, Timmons S. Resisting big data exploitations in public healthcare: free riding or  
506 distributive justice? *Sociology of health & illness*. 2019;41(8):1585-99.
- 507 8. Mayo RM, Summey JF, Williams JE, Spence RA, Kim S, Jagsi R. Qualitative Study of Oncologists'  
508 Views on the CancerLinQ Rapid Learning System. *Journal of oncology practice*. 2017;13(3):176-84.
- 509 9. Köngeter A, Jungkunz M, Winkler EC, Schickhardt C, Mehlis K. Sekundärnutzung klinischer  
510 Daten aus der Patientenversorgung für Forschungszwecke: Eine qualitative Interviewstudie zu Nutzen-  
511 und Risikopotenzialen aus Sicht von Expertinnen und Experten für den deutschen Forschungskontext.  
512 In: Richter G, Loh W, Buyx A, Graf von Kielmansegg S, editors. *Datenreiche Medizin und das Problem*  
513 *der Einwilligung*. Berlin, Heidelberg: Springer; 2022. p. 185-210.
- 514 10. Cumyn A, Dault R, Barton A, Cloutier A-M, Ethier J-F. Citizens, research ethics committee  
515 members and researchers' attitude toward information and consent for the secondary use of health  
516 data: Implications for research within learning health systems. *J Empir Res Hum Res Ethics*.  
517 2021;16(3):165-78.
- 518 11. Perera G, Holbrook A, Thabane L, Foster G, Willison DJ. Views on health information sharing  
519 and privacy from primary care practices using electronic medical records. *Int J Med Inform*.  
520 2011;80(2):94-101.
- 521 12. Köngeter A, Schickhardt C, Jungkunz M, Susanne B, Mehlis K, Winkler EC. Patients' willingness  
522 to provide their clinical data for research purposes and acceptance of different consent models:

- 523 Findings from a representative survey of cancer patients in Germany. *J Med Internet Res* (forthcoming).  
524 2022.
- 525 13. Spector-Bagdady K, Krenz CD, Brummel C, Brenner JC, Bradford CR, Shuman AG. “My Research  
526 Is Their Business, but I'm Not Their Business”: Patient and Clinician Perspectives on Commercialization  
527 of Precision Oncology Data. *The oncologist*. 2020;25(7):620-6.
- 528 14. Arndt BG, Beasley JW, Watkinson MD, Temte JL, Tuan WJ, Sinsky CA, et al. Tethered to the  
529 EHR: Primary Care Physician Workload Assessment Using EHR Event Log Data and Time-Motion  
530 Observations. *Ann Fam Med*. 2017;15(5):419-26.
- 531 15. de Hoop T, Neumuth T. Evaluating Electronic Health Record Limitations and Time Expenditure  
532 in a German Medical Center. *Appl Clin Inform*. 2021;12(05):1082-90.
- 533 16. Adler-Milstein J, Zhao W, Willard-Grace R, Knox M, Grumbach K. Electronic health records and  
534 burnout: Time spent on the electronic health record after hours and message volume associated with  
535 exhaustion but not with cynicism among primary care clinicians. *J Am Med Inform Assoc*.  
536 2020;27(4):531-8.
- 537 17. Bruland P, Doods J, Brix T, Dugas M, Storck M. Connecting healthcare and clinical research:  
538 Workflow optimizations through seamless integration of EHR, pseudonymization services and EDC  
539 systems. *Int J Med Inform*. 2018;119:103-8.
- 540 18. Raymond L, Paré G, Ortiz de Guinea A, Poba-Nzaou P, Trudel M-C, Marsan J, et al. Improving  
541 performance in medical practices through the extended use of electronic medical record systems: a  
542 survey of Canadian family physicians. *BMC Med Inform Decis Mak*. 2015;15(1):27.
- 543 19. Ballantyne A. How should we think about clinical data ownership? *Journal of Medical Ethics*.  
544 2020;46(5):289-94.
- 545 20. Salomon RM, Blackford JU, Rosenbloom ST, Seidel S, Clayton EW, Dilts DM, et al. Openness of  
546 patients' reporting with use of electronic records: psychiatric clinicians' views. *J Am Med Inform Assoc*.  
547 2010;17(1):54-60.

- 548 21. Krahe MA, Wolski M, Mickan S, Toohey J, Scuffham P, Reilly S. Developing a strategy to improve  
549 data sharing in health research: A mixed-methods study to identify barriers and facilitators. *Health Inf*  
550 *Manag [Internet]*. 2020:1833358320917207.
- 551 22. Orton ML, Nilsen P, Nelson Follin N, Dannapfel P. Is It Possible for Registered Nurses and  
552 Physicians to Combine Research and Clinical Work to Facilitate Evidence-Based Practice? *Worldviews*  
553 *Evid Based Nurs*. 2021;18(1):15-22.
- 554 23. Varhol RJ, Randall S, Boyd JH, Robinson S. Australian General Practitioner Perceptions to  
555 Sharing Clinical Data for Secondary Use: A Mixed Method Approach. *Research Square [Preprint]*. 2021.
- 556 24. Shabani M, Thorogood A, Borry P. Who should have access to genomic data and how should  
557 they be held accountable? Perspectives of Data Access Committee members and experts. *Eur J Hum*  
558 *Genet*. 2016;24:1671-5.
- 559 25. Grava-Gubins I, Scott S. Effects of various methodologic strategies: survey response rates  
560 among Canadian physicians and physicians-in-training. *Can Fam Physician*. 2008;54(10):1424-30.
- 561

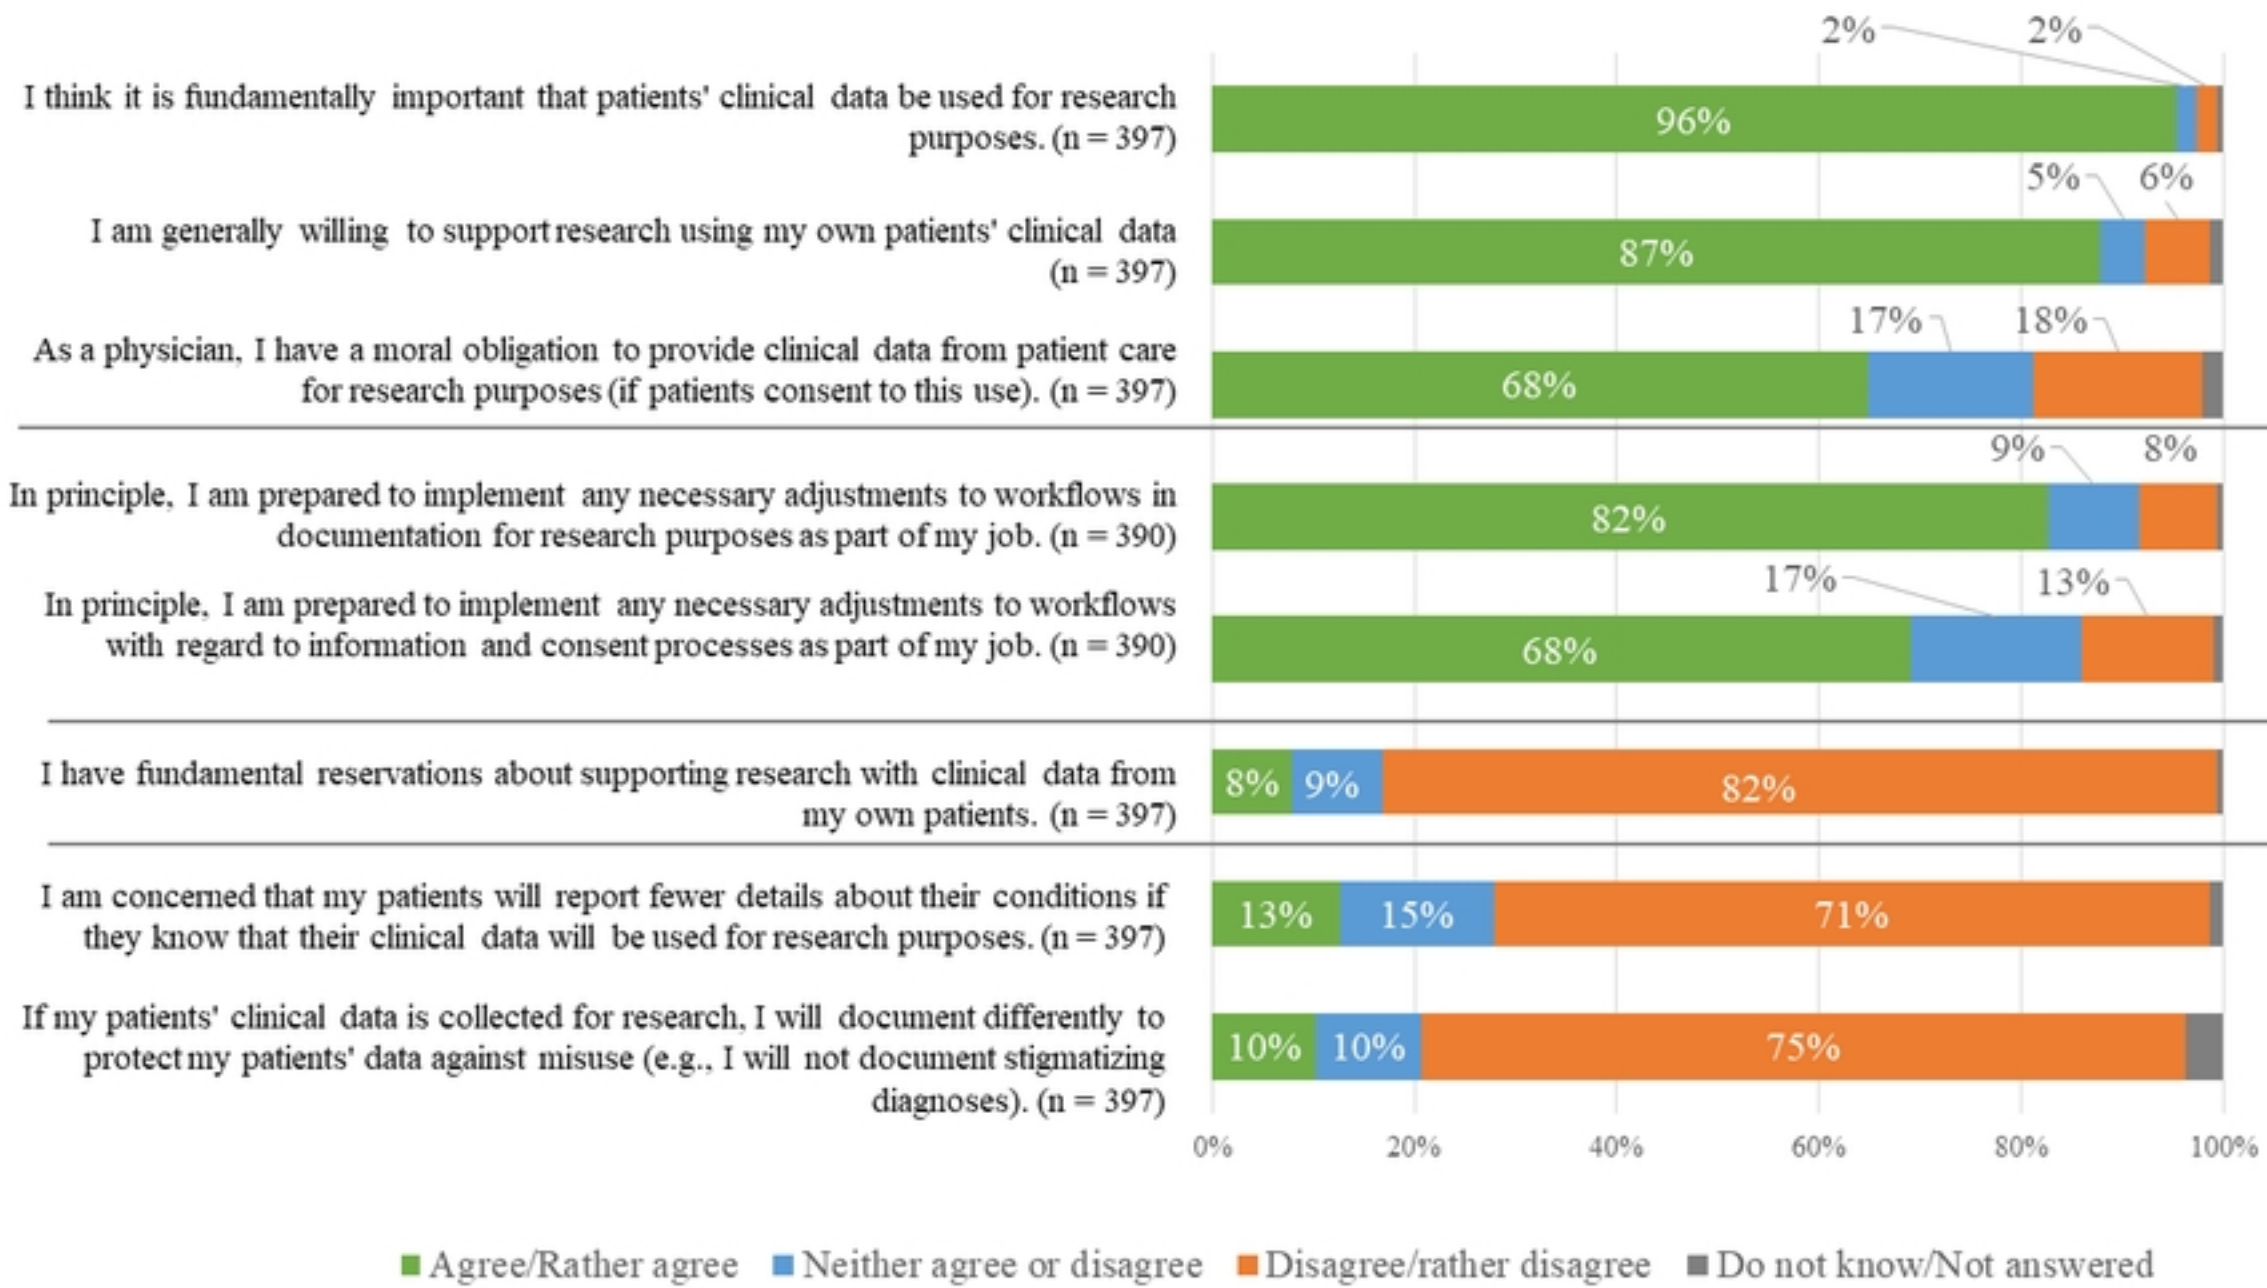

Figure 1
